# Supplementary material for: Zeolitic Imidazolate Framework-8 (ZIF-8) as a Drug Delivery Vehicle for the Transport and Release of Telomerase Inhibitor BIBR 1532
Source: MDPI journal article supplement (doi:10.3390/nano13111779), 2023-05-31
Supplement: s1 [file s1]

## Supporting Information

# **Zeolitic Imidazolate Framework-8 (ZIF-8) as a Drug Delivery Vehicle for the Transport and Release of Telomerase Inhibitor BIBR 1532**

**Shunyu Zhang <sup>1,2,†</sup>, Jinxia Li <sup>2,†</sup>, Liang Yan <sup>2</sup>, Yue You <sup>2</sup>, Feng Zhao <sup>2,\*</sup>, Jixing Cheng <sup>1</sup>, Limin Yang <sup>2</sup>, Yanqi Sun <sup>3</sup>, Qingchao Chang <sup>2</sup>, Ru Liu <sup>2</sup> and Yunhui Li <sup>1,\*</sup>**

<sup>1</sup> Key Laboratory of Environmental Medicine Engineering of Ministry of Education, School of Public Health, Southeast University, Nanjing 210000, China; syzhang@ihep.ac.cn (S.Z.); chengjx0210@163.com (J.C.)

<sup>2</sup> CAS Key Lab for Biomedical Effects of Nanomaterials and Nanosafety, Institute of High Energy Physics, Chinese Academy of Sciences, Beijing 100049, China; lijinxia@ihep.ac.cn (J.L.); yanliang@ihep.ac.cn (L.Y.); youyue@ihep.ac.cn (Y.Y.); yanglm@ihep.ac.cn (L.Y.); changqc@ihep.ac.cn (Q.C.); liuru@ihep.ac.cn (R.L.)

<sup>3</sup> Department of Prevention and Health Care, Rizhao 276800, China; tangdou888@163.com (Y.S.)

\* Correspondence: zhaof@ihep.ac.cn (F.Z.); yhli@seu.edu.cn (Y.L.); Tel.: +86-138-113-07996 (F.Z.); +86-135-125-38992 (Y.L.);

† These authors contributed equally to this work.

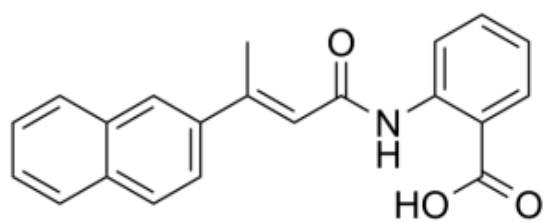

**Figure S1.** The structure of BIBR 1532.

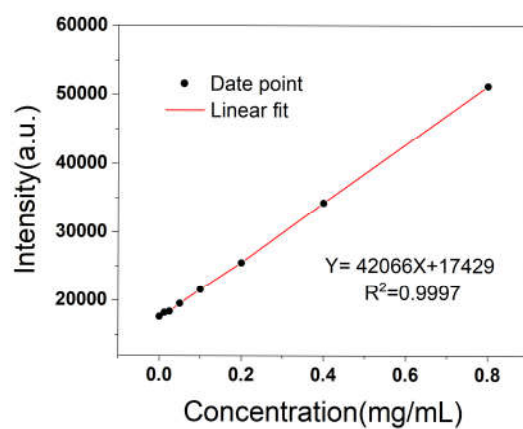

**Figure S2.** Plot of the standard curve. Fluorescence intensity values were plotted as functions of 6-AF@BIBR 1532 concentrations.

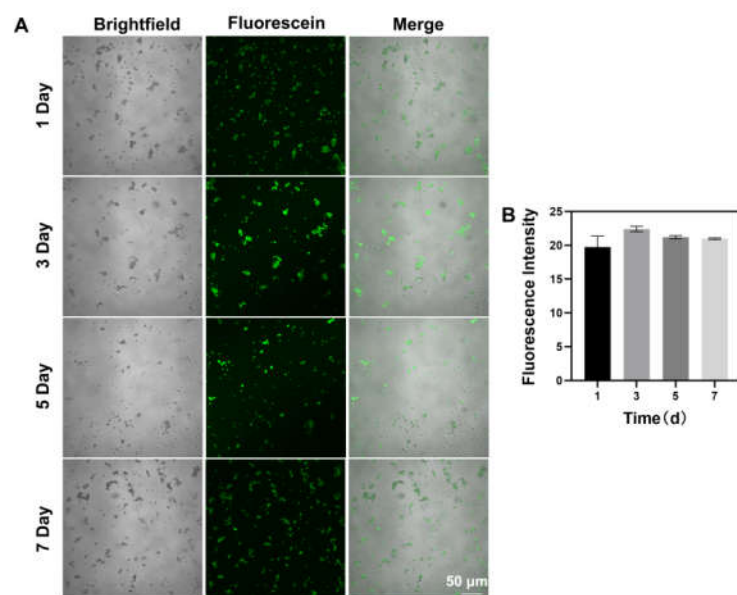

**Figure S3.** Fluorescence stability of fluorescein@ZIF-8. (A) Fluorescence signals of fluorescein@ZIF-8 detected at 1, 3, 5 and 7 days. (B) Quantitative analysis of fluorescence intensity using Image J.

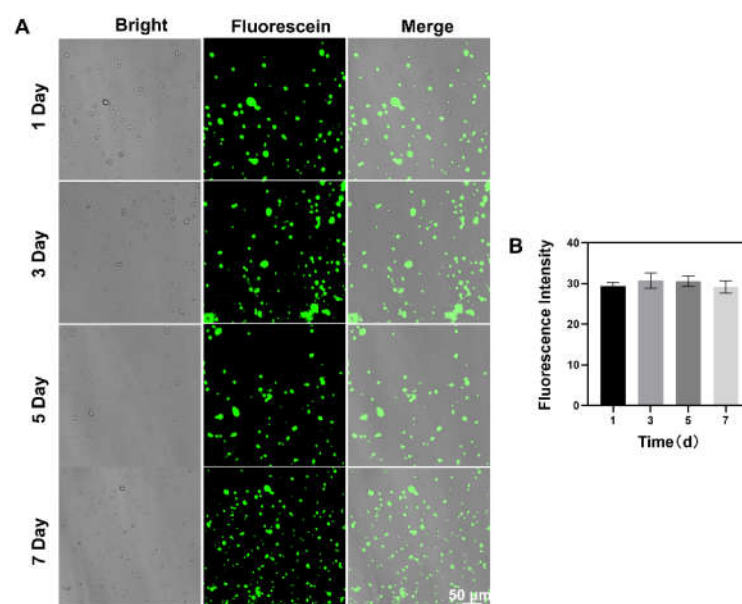

**Figure S4.** Fluorescence stability of 6-AF@BIBR 1532@ZIF-8. **(A)** Fluorescence signals of 6-AF@BIBR 1532@ZIF-8 detected at 1, 3, 5 and 7 days. **(B)** Quantitative analysis of fluorescence intensity using Image J.

**Table S1.** A summary of the similarities and differences between our present study and others' study ([78])

| Similarities                                                                                                                                                                                                                                       | Differences                                                                                                                                                                                                                                                                                                                                                                                                                                                                                                                                                                                                                                                                                                                                                                                                                                                                                                                                                                                                                                                                                                      |
|----------------------------------------------------------------------------------------------------------------------------------------------------------------------------------------------------------------------------------------------------|------------------------------------------------------------------------------------------------------------------------------------------------------------------------------------------------------------------------------------------------------------------------------------------------------------------------------------------------------------------------------------------------------------------------------------------------------------------------------------------------------------------------------------------------------------------------------------------------------------------------------------------------------------------------------------------------------------------------------------------------------------------------------------------------------------------------------------------------------------------------------------------------------------------------------------------------------------------------------------------------------------------------------------------------------------------------------------------------------------------|
| <p><b>Starting point:</b><br/>BIBR 1532 has a hydrophobic structure and is insoluble in water;</p> <p><b>The role of the carrier:</b><br/>Acid-sensitive chemical bond releasing drugs;<br/>The carrier allowed lysosomal escape of the drugs;</p> | <p><b>Key observations:</b><br/>Our: the release of BIBR 1532 from ZIF-8; efficacy comparison of BIBR 1532 with or without ZIF-8 as a drug vector in aspect of proliferation, cell cycle and cellular senescence of tumor cells;<br/>Others': the release of BIBR 1532 from PEG layer; the effect of telomerase inhibition by BIBR 1532 on DOX resistance reversal;</p> <p><b>Drug release:</b><br/>Our: pH-sensitive ZIF-8 helps release BIBR 1532;<br/>Others': redox-sensitive PEG layer actualizes BIBR 1532 release;</p> <p><b>Functions of BIBR 1532:</b><br/>Our: BIBR 1532 inhibits tumor cell proliferation, induces cell cycle arrest and promote cellular senescence of tumor cells;<br/>Others': BIBR 1532 weakens mitochondria protection and enhances ROS production and meanwhile promotes drug resistance tumor cell apoptosis;</p> <p><b>The significance of the experiment:</b><br/>Our: Improve the bioavailability of BIBR 1532 and enhance its biological effects;<br/>Others': Stable loading of BIBR 1532 to build a telomerase-termination nanoplatfrom for DOX resistance reversal;</p> |
